# Supplementary material for: Asthma Control: The Right Inhaler for the Right Patient
Source: Springer Nature journal article supplement (doi:10.1007/s12325-015-0201-9), 2015-04-01
Supplement: MOESM1 [file 9203482]

- The achievement of asthma control is the main challenge in the management of the disease.
- Several factors contribute to the loss of asthma control, and these are related to the patient, the physician and the drug (active principle, formulation, device).
- The “ideal inhaler” does not exist in real life, and all currently used inhalers differ in terms of technology, as well as preference by the patient.
- Advances in technology have led to the design of new devices and the development of formulations characterized by extrafine particles that facilitate the distribution and deposition of the drug particles along the respiratory tract.

This summary slide represents the opinions of the authors. For a full list of acknowledgments and conflicts of interest for all authors of this article, please see the full text online. Copyright © The Author 2015. Creative Commons Attribution Noncommercial License (CC BY-NC).
